# Supplementary figures and images for: Intact synapse structure and function after combined knockout of PTPδ, PTPσ, and LAR
Source: eLife journal article supplement (doi:10.7554/elife.66638), 2021-03-03

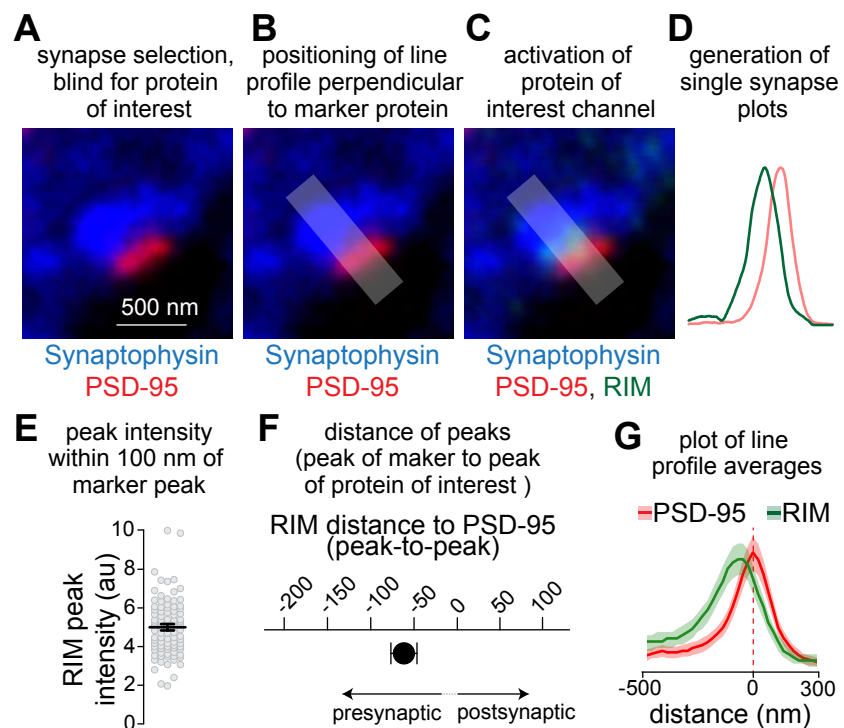

Figure 1 - figure supplement 2, Emperador-Melero et al

Supplement: supp [file elife-66638-supp-v1.zip]

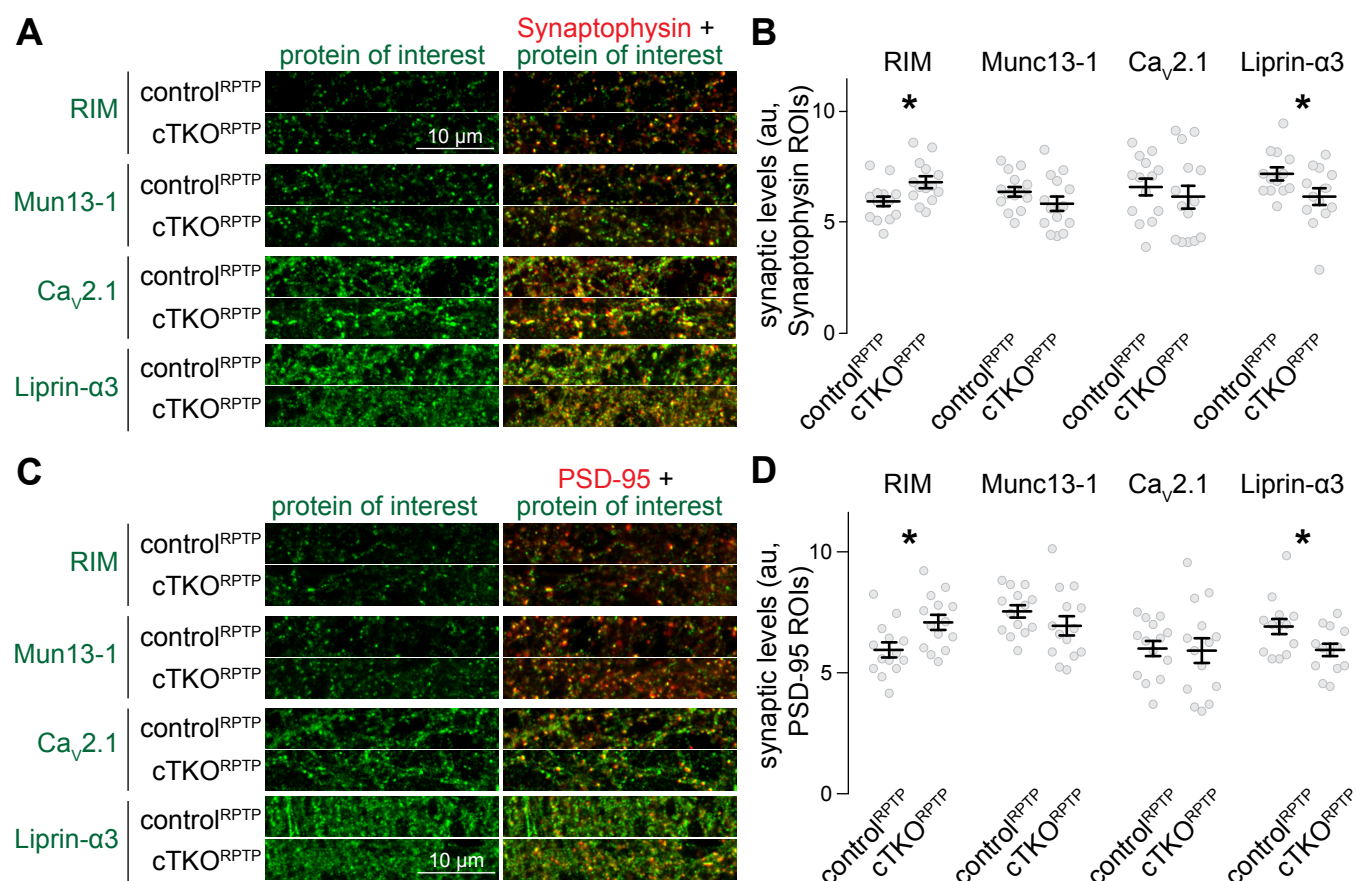

Figure 2 - figure supplement 1, Emperador-Melero et al

Supplement: supp [file elife-66638-supp-v1.zip]

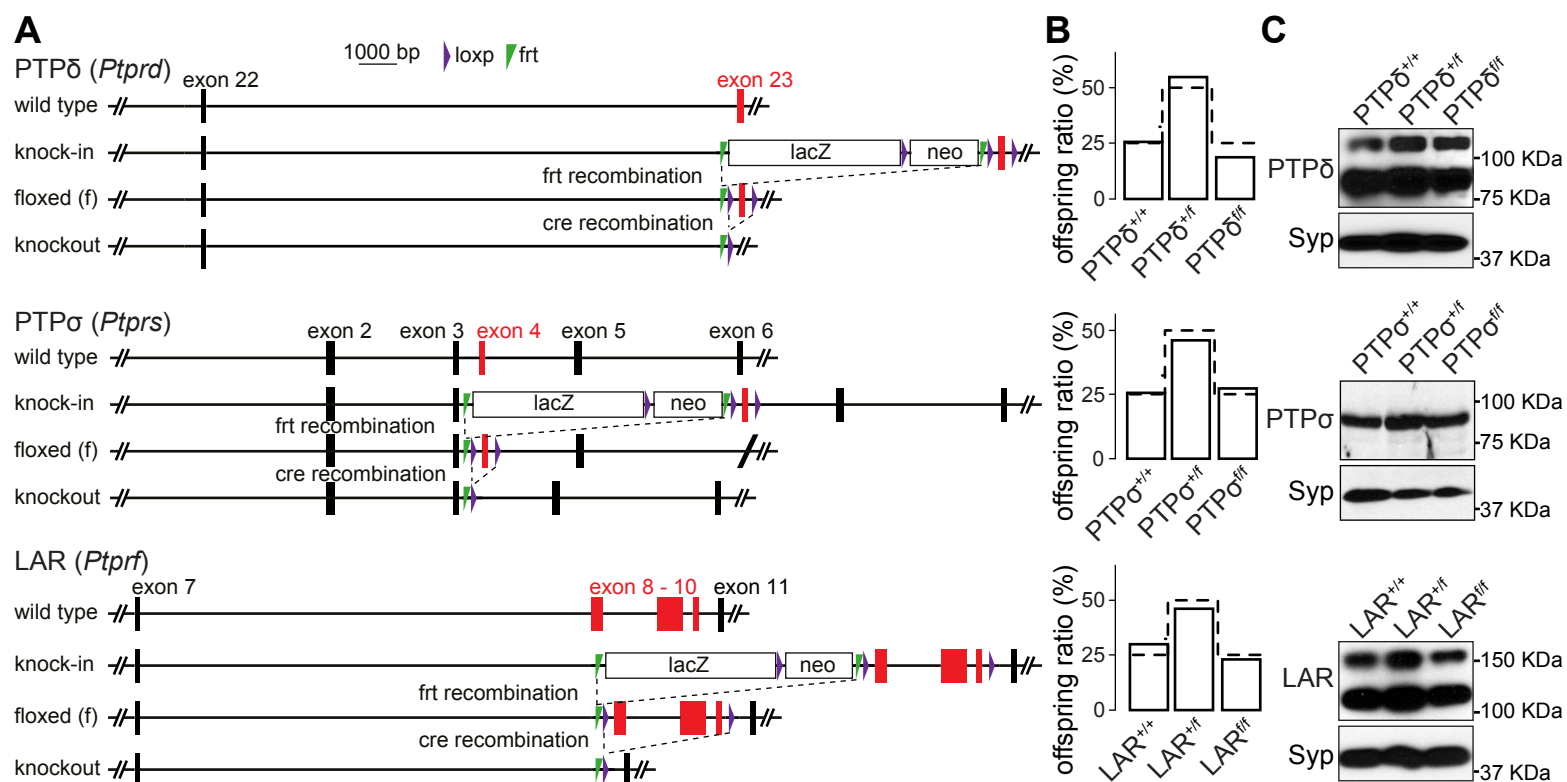

Supplement: supp [file elife-66638-supp-v1.zip]

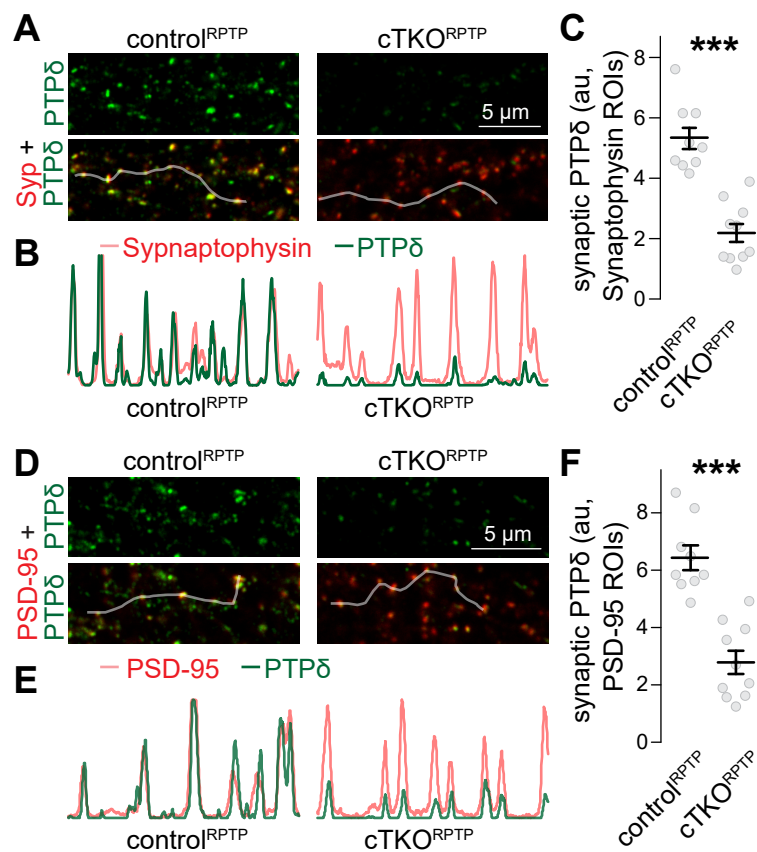

Figure 1 - figure supplement 3, Emperador-Melero et al

Supplement: supp [file elife-66638-supp-v1.zip]
